# Supplementary material for: lncRNA ZFAS1 Positively Facilitates Endothelial Ferroptosis via miR‐7‐5p/ACSL4 Axis in Diabetic Retinopathy
Source: Hindawi journal article supplement (doi:10.1155/2022/9004738), 2022-01-01
Supplement: f1 [file 9004738.f1.pdf]

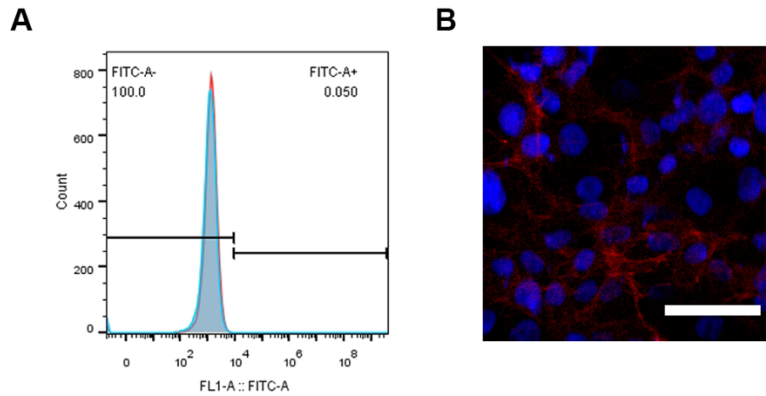

**Supplementary Figure 1** Identification of primarily cultured hRECs.

(A) Flow cytometric analysis of characteristic cell marker CD31. Red curves represent isotype controls for PE dye and blue curves represent measured endothelial marker CD31. (B) Primarily cultured cells at passage 1 stained positively for the endothelial cell marker CD31 (scale bar = 40  $\mu$ m).

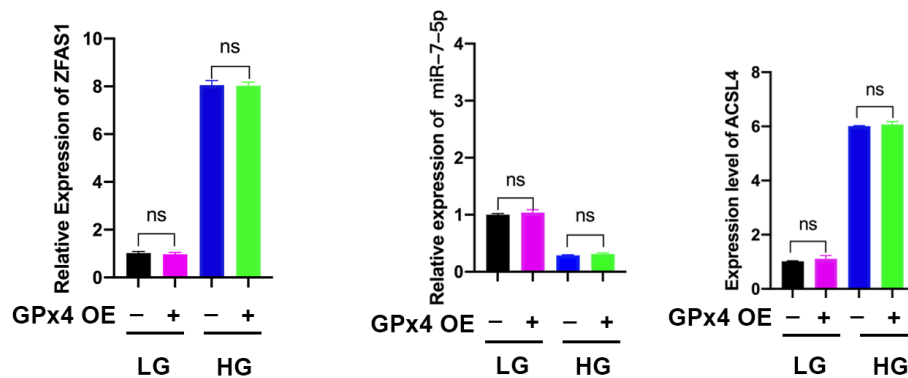

**Supplementary Figure 2** The effects of GPx4 overexpression on ZFAS1/miR-7-5p/ACSL4 axis.

RT-qPCR results demonstrated that no detectable alteration was observed in ZFAS1, miR-7-5p, and ACSL4 expression level after GPx4 overexpression (GPx4 OE). GAPDH and miR-39-3p served as endogenous and exogenous normalization for ACSL4 and miR-7-5p detection, respectively. ns means not significant.

**Supplementary Table 1** RNA sequences and the primer sequences for RT-qPCR

| <b>Oligonucleotide</b> | <b>Forward</b>                   | <b>Reverse</b>                 |
|------------------------|----------------------------------|--------------------------------|
| mimic-NC               | 5'UUCUCCGAACGUGUCACGUTT-3'       |                                |
| miR-7-5p mimic         | 5'UGGAAGACUAGUGAU<br>UUUGUUGU-3' | 5'AACAAAUCACUAGUCUCCA<br>UU-3' |
| si-ACSL4               | 5'-TAGATATCAGTTGTGTAA-3'         |                                |

  

| <b>Primer</b> | <b>Forward</b>                   | <b>Reverse</b>                  |
|---------------|----------------------------------|---------------------------------|
| ZFAS1         | 5'ACGTGCAGACATCTACAACCT3         | 5'TACTTCCAACACCCGCAT-3'         |
| ACSL4         | 5'CATCCCTGGAGCAGATACTCT-<br>3'   | 5'TCACTTAGGATTTCCCTGGTCC-<br>3' |
| GAPDH         | 5'AGGTGAAGGTCGGAGTCAACG<br>-3'   | 5'AGGGGTCATTGATGGCAACA-3'       |
| U6            | 5'CTCGCTTCGGCAGCACATATAC<br>T-3' | 5'ACGCTTCACGAATTTGCGTGTC-<br>3' |

**Supplementary Table 2** A total 108 dysregulated lncRNAs were identified between the CD31<sup>+</sup> endothelial cells isolated from nine fibrovascular membranes (FVM) samples and four control retinal samples without diabetes diagnosis using a differential gene expression analysis.

| <b>Gen id</b> | <b>logFC</b> | <b>AveExpr</b> | <b>t</b> | <b>P.Value</b> | <b>B</b> |
|---------------|--------------|----------------|----------|----------------|----------|
|---------------|--------------|----------------|----------|----------------|----------|

---

|          |            |            |            |            |           |
|----------|------------|------------|------------|------------|-----------|
| DLGAP1-  |            |            |            |            | 7.6965537 |
| AS3      | -1.4710454 | 0.32849254 | -10.757025 | 1.33E-07   | 6         |
| FAM155A  |            |            |            |            | 4.7458838 |
| -IT1     | -2.9211402 | 0.78065509 | -7.9044537 | 3.72E-06   | 3         |
| DIO3OS   |            |            |            |            | 4.0160664 |
|          | -4.4987755 | 1.19044822 | -7.3215001 | 8.17E-06   | 3         |
| LINC0126 |            |            |            |            | 3.1526454 |
| 7        | -4.3167197 | 1.09421478 | -6.6779134 | 2.04E-05   | 7         |
| LEMD1-   |            |            |            |            | 2.9416331 |
| AS1      | -1.4600016 | 0.44365662 | -6.5273842 | 2.55E-05   | 9         |
| ENTPD3-  |            |            |            |            | 2.7069293 |
| AS1      | -1.2735467 | 0.37366433 | -6.3628158 | 3.26E-05   | 6         |
| LINC0155 |            |            |            |            | 2.4843469 |
| 9        | -3.71664   | 0.96429112 | -6.2094107 | 4.12E-05   | 6         |
| PWRN1    |            |            |            |            | 2.0916904 |
|          | -1.926368  | 0.39854217 | -5.9447623 | 6.21E-05   | 3         |
| LINC0151 |            |            |            |            | 2.0811043 |
| 1        | -1.4352726 | 0.37756622 | -5.9377284 | 6.28E-05   | 3         |
| PLCE1-   |            |            |            |            | 1.5618519 |
| AS2      | -4.8388368 | 1.6898932  | -5.5988212 | 0.00010762 | 5         |
| CLIP1-   |            |            |            |            | 1.3532726 |
| AS1      | -2.5400884 | 0.81229483 | -5.4658787 | 0.00013356 | 1         |

---

---

|                 |            |            |            |            |            |
|-----------------|------------|------------|------------|------------|------------|
| LINC0123        |            |            |            | 0.00013880 | 1.3160339  |
| 1               | -1.7238205 | 0.55908245 | -5.4423255 | 5          | 4          |
| FRY-AS1         |            |            |            | 0.00013963 | 1.3102414  |
|                 | -3.3454689 | 1.16242564 | -5.4386667 | 9          | 2          |
| LINC0071        |            |            |            | 0.00023470 | 0.8073014  |
| 0               | -1.4622803 | 0.40781713 | -5.1257507 | 2          | 3          |
| LINC0155        |            |            |            | 0.00030634 | 0.5487209  |
| 5               | -4.4836692 | 1.64790877 | -4.9683099 | 4          | 7          |
| LINC0050        |            |            |            | 0.00034672 | 0.4284233  |
| 7               | -1.6122581 | 0.3915245  | -4.8958007 | 6          | 4          |
| LINC0109        |            |            |            | 0.00038754 | 0.3202554  |
| 1               | -1.1770119 | 0.4608682  | -4.8309834 | 3          | 7          |
| LHFPL3-<br>AS2  |            |            |            | 0.00054311 | -0.007996  |
|                 | -2.5479843 | 0.67044479 | -4.6363714 | 8          |            |
| CATIP-<br>AS2   |            |            |            | 0.00058085 | -0.0733644 |
|                 | -2.7391397 | 0.69985332 | -4.5979709 | 8          |            |
| SPATA41         |            |            |            | 0.00065916 | -0.1964381 |
|                 | -2.220901  | 0.72328936 | -4.5259727 | 1          |            |
| ZFAS1           |            |            | 4.4686367  | 0.00072934 | -0.2949156 |
|                 | 3.75670016 | 4.26267847 | 3          | 2          |            |
| ZNF252P-<br>AS1 |            |            |            | 0.00081582 | -0.4039868 |
|                 | -1.9932482 | 0.58966903 | -4.4054046 |            |            |

---

---

|          |            |            |            |            |            |
|----------|------------|------------|------------|------------|------------|
| TGFB2-   |            |            |            | 0.00141060 |            |
|          | -1.7759999 | 0.6270409  | -4.1001359 |            | -0.9369247 |
| OT1      |            |            |            | 4          |            |
| LINC0113 |            |            |            | 0.00153134 |            |
|          | -3.5890891 | 1.27942644 | -4.054843  |            | -1.016815  |
| 2        |            |            |            | 4          |            |
| MIF-AS1  |            |            | 4.0226804  | 0.00162351 |            |
|          | 2.92044245 | 3.10096112 |            |            | -1.0736603 |
|          |            |            | 7          | 7          |            |
| COLCA1   |            |            |            | 0.00190142 |            |
|          | -1.7823379 | 0.74214159 | -3.9360194 |            | -1.227278  |
|          |            |            |            | 4          |            |
| LINC0099 |            |            |            | 0.00264395 |            |
|          | -3.4418831 | 1.32645915 | -3.7564406 |            | -1.5474482 |
| 4        |            |            |            | 3          |            |
| LINC0128 |            |            |            | 0.00278985 |            |
|          | -4.0875048 | 1.77950551 | -3.7273242 |            | -1.5995609 |
| 9        |            |            |            | 8          |            |
| CASC20   |            |            |            | 0.00298667 |            |
|          | -3.5954107 | 1.38027106 | -3.690425  |            | -1.6656721 |
|          |            |            |            | 7          |            |
| C8orf49  |            |            |            | 0.00313556 |            |
|          | -4.6300025 | 2.4551697  | -3.6641287 |            | -1.7128301 |
|          |            |            |            | 0.00327039 |            |
| TCL6     |            |            |            |            | -1.753633  |
|          | -3.8442528 | 1.54240611 | -3.6413913 |            |            |
|          |            |            |            | 9          |            |
| LINC0136 |            |            |            | 0.00437624 |            |
|          | -2.9911909 | 0.92518848 | -3.4846101 |            | -2.0355345 |
| 0        |            |            |            | 9          |            |
| MIR22HG  |            |            | 3.3604403  | 0.00551730 |            |
|          | 3.9007892  | 3.94647777 |            |            | -2.2592219 |
|          |            |            | 9          | 6          |            |

---

---

|          |            |            |            |            |            |
|----------|------------|------------|------------|------------|------------|
| WDR11-   |            |            |            | 0.00560175 |            |
| AS1      | -3.2199691 | 1.70159224 | -3.3523134 | 4          | -2.2738673 |
| ERVK13-  |            |            | 3.3313100  | 0.00582610 |            |
| 1        | 2.30362055 | 4.1505639  | 8          | 8          | -2.3117165 |
| KRBOX1-  |            |            |            | 0.00601017 |            |
| AS1      | -1.7762186 | 0.70401075 | -3.3146805 | 2          | -2.3416832 |
| SORCS3-  |            |            |            | 0.00625741 |            |
| AS1      | -1.6284024 | 0.74873236 | -3.2931348 | 9          | -2.3805065 |
| LINC0087 |            |            |            | 0.00708806 |            |
| 0        | -3.5484501 | 1.60596279 | -3.2265699 | 2          | -2.5004138 |
| WDFY3-   |            |            |            | 0.00719560 |            |
| AS2      | -1.5824012 | 0.65104239 | -3.2185327 | 3          | -2.5148863 |
| LINC0152 |            |            |            | 0.00908461 |            |
| 0        | -1.0593642 | 0.30147837 | -3.0941926 | 3          | -2.7385254 |
| LINC0047 |            |            |            | 0.00950941 |            |
| 1        | -2.0278403 | 0.96270184 | -3.0698271 | 6          | -2.7822735 |
| SLC39A1  |            |            |            | 0.01000093 |            |
| 2-AS1    | -1.853533  | 0.50693687 | -3.0429587 | 8          | -2.8304781 |
| LINC0070 |            |            |            |            |            |
| 7        | -3.9863704 | 2.78169011 | -3.0199029 | 0.01044291 | -2.8718081 |
| GAS5     |            |            | 2.9939470  | 0.01096385 |            |
|          | 3.67090603 | 3.96884949 | 2          | 2          | -2.9182953 |

---

---

|          |            |            |            |            |            |
|----------|------------|------------|------------|------------|------------|
| LINC0093 |            |            |            | 0.01119706 |            |
| 0        | -1.7437713 | 0.88717996 | -2.9827235 | 4          | -2.9383821 |
| LINC0069 |            |            |            | 0.01126781 |            |
| 1        | -1.2761787 | 0.66753253 | -2.9793645 | 6          | -2.9443919 |
| LINC0029 |            |            |            | 0.01133807 |            |
| 9        | -2.4687919 | 1.4208337  | -2.9760496 | 6          | -2.950322  |
| TMCC1-   |            |            |            | 0.01246928 |            |
| AS1      | -3.4730649 | 1.82214051 | -2.9253233 | 9          | -3.0409593 |
| NAV2-    |            |            |            | 0.01409059 |            |
| AS5      | -4.0061997 | 2.55890654 | -2.8600782 | 3          | -3.1572038 |
| DNAJC9-  |            |            |            | 0.01418651 |            |
| AS1      | -1.692498  | 0.74530722 | -2.8564551 | 3          | -3.1636466 |
| LINC0015 |            |            |            | 0.01437333 |            |
| 8        | -2.2446696 | 1.30936031 | -2.8494676 | 7          | -3.1760685 |
| LINC0090 |            |            |            | 0.01464060 |            |
| 1        | -2.0512018 | 1.14524051 | -2.8396262 | 3          | -3.193555  |
| CEBPB-   |            |            |            | 0.01470588 |            |
| AS1      | -2.8502869 | 1.59329985 | -2.8372493 | 6          | -3.1977767 |
| C8orf31  |            |            |            | 0.01562563 |            |
|          | -2.7555551 | 0.7931688  | -2.8048286 | 1          | -3.2552983 |
| LINC0046 |            |            |            | 0.01571546 |            |
| 2        | -1.3924286 | 0.35271905 | -2.8017637 | 5          | -3.2607298 |

---

---

|          |            |            |            |            |            |
|----------|------------|------------|------------|------------|------------|
| LINC0055 |            |            |            | 0.01608420 |            |
| 0        | -2.5160656 | 1.66399517 | -2.7893621 | 3          | -3.2826962 |
| LINC0060 |            |            |            | 0.01639085 |            |
| 6        | -3.2198475 | 1.69891621 | -2.7792604 | 6          | -3.3005751 |
| LINC0129 |            |            |            | 0.01749377 |            |
| 9        | -3.4557692 | 2.51204606 | -2.7444078 | 4          | -3.3621609 |
| LINC0065 |            |            |            | 0.01777468 |            |
| 2        | -2.0189293 | 0.51893776 | -2.7358769 | 4          | -3.3772111 |
| LINC0151 |            |            |            | 0.01800116 |            |
| 6        | -1.7616249 | 0.92262286 | -2.729095  | 3          | -3.3891685 |
| LINC-    |            |            |            | 0.01854302 |            |
| PINT     | 3.20856617 | 2.94040549 | 2.7132037  | 5          | -3.4171622 |
| LINC0120 |            |            |            | 0.01868445 |            |
| 4        | -1.696483  | 0.82943962 | -2.7091311 | 1          | -3.4243306 |
| EGFLAM   |            |            |            |            |            |
| -AS2     | -2.8778582 | 1.82633626 | -2.6927913 | 0.01926261 | -3.4530672 |
| SNHG6    | 2.72830295 | 4.96389472 | 2.6921313  | 0.01928632 | -3.4542269 |
|          |            |            | 9          | 5          |            |
| LINC0091 |            |            |            | 0.02028999 |            |
| 7        | -2.9987067 | 0.839286   | -2.6649083 | 9          | -3.5020125 |
| HCG11    | -3.3183918 | 3.06540302 | -2.6535198 | 0.02072489 | -3.5219689 |
|          |            |            |            | 9          |            |

---



---

|          |            |            |            |            |            |
|----------|------------|------------|------------|------------|------------|
| LINC0092 |            |            |            |            |            |
| 7        | -3.2509643 | 1.75451787 | -2.6198416 | 0.02206507 | -3.5808622 |
| DSG2-    |            |            |            | 0.02312801 |            |
| AS1      | -1.6797904 | 0.64172906 | -2.594522  | 9          | -3.6250125 |
| LINC0156 |            |            |            | 0.02321644 |            |
| 1        | -2.7690085 | 0.78478968 | -2.5924672 | 4          | -3.6285907 |
| LINC0124 |            |            |            | 0.02371604 |            |
| 7        | -4.0670694 | 2.58861767 | -2.5809988 | 3          | -3.6485473 |
| CACNA1   |            |            |            | 0.02385243 |            |
| C-AS4    | -3.7199238 | 2.71771959 | -2.5779088 | 6          | -3.6539202 |
| ERICH3-  |            |            |            | 0.02391546 |            |
| AS1      | -3.0777581 | 1.9750823  | -2.5764865 | 9          | -3.6563927 |
| ENTPD1-  |            |            |            | 0.02425815 |            |
| AS1      | -3.5424245 | 2.78354374 | -2.5688178 | 4          | -3.6697177 |
| LINC0096 |            |            |            | 0.02434696 |            |
| 7        | -4.1361636 | 2.61677851 | -2.5668475 | 9          | -3.6731395 |
| GTF3C2-  |            |            |            | 0.02495069 |            |
| AS1      | -2.2894118 | 0.93493783 | -2.5536367 | 2          | -3.6960638 |
| THUMPD   |            |            | 2.5370906  | 0.02572740 |            |
| 3-AS1    | 3.57162659 | 4.18358453 | 1          | 2          | -3.7247292 |
| LINC0048 |            |            |            | 0.02609769 |            |
| 5        | -2.1483497 | 1.27809691 | -2.5293725 | 5          | -3.7380824 |

---

---

|          |            |            |            |            |            |
|----------|------------|------------|------------|------------|------------|
| GPR1-AS  | -2.162699  | 1.31894136 | -2.5207087 | 0.02651952 | -3.7530577 |
|          |            |            |            | 3          |            |
| DDX11-   |            |            |            | 0.02673089 |            |
| AS1      | -1.3521424 | 0.52816121 | -2.5164176 |            | -3.7604692 |
|          |            |            |            | 3          |            |
| LARS2-   |            |            |            | 0.02678017 |            |
| AS1      | -1.7354155 | 0.94717719 | -2.5154218 |            | -3.7621886 |
|          |            |            |            | 6          |            |
| LINC0042 |            |            |            | 0.02742905 |            |
| 6        | -1.9647512 | 0.96796443 | -2.5024741 |            | -3.7845266 |
|          |            |            |            | 8          |            |
| TUB-AS1  |            |            |            | 0.02768818 |            |
|          | -3.3760009 | 2.04821534 | -2.4973863 |            | -3.793295  |
|          |            |            |            | 7          |            |
| LINC0070 |            |            |            | 0.02797187 |            |
| 1        | -3.5311339 | 3.67608606 | -2.4918689 |            | -3.8027978 |
|          |            |            |            | 7          |            |
| LINC0026 |            |            |            | 0.02849938 |            |
| 9        | -1.54763   | 0.5063354  | -2.4817521 |            | -3.8202056 |
|          |            |            |            | 2          |            |
| NRSN2-   |            |            |            | 0.02931502 |            |
| AS1      | -1.3433054 | 0.45008381 | -2.4664604 |            | -3.8464763 |
|          |            |            |            | 5          |            |
| LINC0126 |            |            |            | 0.03073135 |            |
| 6        | -2.9083933 | 2.42264595 | -2.4408585 |            | -3.8903456 |
|          |            |            |            | 4          |            |
| SNAP25-  |            |            |            | 0.03391195 |            |
| AS1      | -1.8254407 | 0.69221126 | -2.3872799 |            | -3.9816688 |
|          |            |            |            | 9          |            |
| LINC0155 |            |            |            | 0.03523027 |            |
| 0        | -1.3319192 | 0.54597387 | -2.366477  |            | -4.0169415 |
|          |            |            |            | 4          |            |

---

---

|          |            |            |            |            |            |
|----------|------------|------------|------------|------------|------------|
| CASC17   | -2.5714905 | 1.23600414 | -2.3462516 | 0.03655902 | -4.0511311 |
| LINC0027 |            |            |            | 0.03804246 |            |
| 1        | -2.0483918 | 1.31128128 | -2.3244866 |            | -4.0878055 |
|          |            |            |            | 2          |            |
| HCG18    | 1.32947769 | 1.75037925 | 2.3158647  | 0.03864587 | -4.102299  |
|          |            |            | 6          | 3          |            |
| CLSTN2-  |            |            |            | 0.03879277 |            |
| AS1      | -2.5807952 | 1.43979741 | -2.3137852 |            | -4.1057919 |
|          |            |            |            | 9          |            |
| NAV2-    |            |            |            | 0.03934113 |            |
| AS4      | -2.1910735 | 0.75067247 | -2.3060884 |            | -4.1187092 |
|          |            |            |            | 8          |            |
| PROSER2  |            |            |            | 0.04353790 |            |
| -AS1     | -2.3186002 | 1.43534106 | -2.250357  |            | -4.2117522 |
|          |            |            |            | 4          |            |
| LINC0084 |            |            |            |            |            |
| 2        | -3.1482492 | 2.67402138 | -2.2421609 | 0.04418988 | -4.2253606 |
|          |            |            |            |            |            |
| FGD5-    |            |            | 2.2363742  | 0.04465575 |            |
| AS1      | 2.09601714 | 4.26070488 |            |            | -4.2349565 |
|          |            |            | 8          | 8          |            |
| IGF2BP2- |            |            |            |            |            |
| AS1      | -1.2642556 | 0.72709584 | -2.2349325 | 0.04477256 | -4.237346  |
|          |            |            |            |            |            |
| PTCSC3   | -2.0227407 | 1.27536807 | -2.2234661 | 0.04571181 | -4.2563263 |
|          |            |            |            | 7          |            |
| PTPRD-   |            |            |            | 0.04580006 |            |
| AS2      | -2.8191703 | 1.59303051 | -2.2224004 |            | -4.2580885 |
|          |            |            |            | 1          |            |

---

|                |            |            |            |            |            |
|----------------|------------|------------|------------|------------|------------|
| FAM225A        | 2.46007457 | 2.18305474 | 2.2159147  | 0.04634054 | -4.2688045 |
|                |            |            | 6          | 1          |            |
| SNHG16         | 2.61728865 | 5.51067429 | 2.2105117  | 0.04679540 | -4.2777221 |
|                |            |            | 6          | 6          |            |
| SMAD5-<br>AS1  | -1.6294541 | 0.61056571 | -2.2063384 | 0.04714963 | -4.284604  |
|                |            |            |            | 6          |            |
| LINC0120       | -4.7424641 | 3.95644796 | -2.1878765 | 0.04874728 | -4.3149834 |
| 6              |            |            |            | 7          |            |
| LINC0084       | -2.5988943 | 1.84129049 | -2.1871159 | 0.04881419 | -4.3162327 |
| 0              |            |            |            | 1          |            |
| TMEM72-<br>AS1 | -1.0542429 | 0.55922908 | -2.1867444 | 0.04884690 | -4.3168429 |
|                |            |            |            | 2          |            |
| C3orf35        | -3.3280128 | 2.66326454 | -2.178812  | 0.04955027 | -4.3298601 |
|                |            |            |            | 9          |            |
| NUTM2B<br>-AS1 | 2.3553037  | 3.76727381 | 2.1757448  | 0.04982480 | -4.3348881 |
|                |            |            | 5          | 4          |            |

**Supplementary Table 3** A total of 69 miRNAs were identified to interact with ZFAS1 using starBase database.

| miRNAid     | miRNAname | geneID         | start    | end      |
|-------------|-----------|----------------|----------|----------|
| MIMAT000069 | hsa-miR-  | ENSG0000017741 |          |          |
| 0           | 296-5p    | 0              | 47894715 | 47894724 |

|             |          |                |          |          |
|-------------|----------|----------------|----------|----------|
| MIMAT001969 | hsa-miR- | ENSG0000017741 |          |          |
| 9           | 4640-5p  | 0              | 47894729 | 47894751 |
| MIMAT001984 | hsa-miR- | ENSG0000017741 |          |          |
| 5           | 4726-5p  | 0              | 47894729 | 47894751 |
| MIMAT000075 | hsa-miR- | ENSG0000017741 |          |          |
| 8           | 135b-5p  | 0              | 47895147 | 47895174 |
| MIMAT000042 | hsa-miR- | ENSG0000017741 |          |          |
| 8           | 135a-5p  | 0              | 47895149 | 47895174 |
| MIMAT000329 | hsa-miR- | ENSG0000017741 |          |          |
| 3           | 624-5p   | 0              | 47895192 | 47895212 |
| MIMAT002102 | hsa-miR- | ENSG0000017741 |          |          |
| 0           | 5000-3p  | 0              | 47895225 | 47895251 |
| MIMAT000587 | hsa-miR- | ENSG0000017741 |          |          |
| 7           | 1286     | 0              | 47895227 | 47895252 |
| MIMAT001895 | hsa-miR- | ENSG0000017741 |          |          |
| 2           | 4436a    | 0              | 47895229 | 47895251 |
| MIMAT000331 | hsa-miR- | ENSG0000017741 |          |          |
| 2           | 642a-5p  | 0              | 47895660 | 47895684 |
| MIMAT000281 | hsa-miR- | ENSG0000017741 |          |          |
| 4           | 432-5p   | 0              | 47895684 | 47895704 |
| MIMAT000481 | hsa-miR- | ENSG0000017741 |          |          |
| 4           | 654-3p   | 0              | 47895701 | 47895722 |

---

---

|             |             |                |          |          |
|-------------|-------------|----------------|----------|----------|
| MIMAT000481 | hsa-miR-    | ENSG0000017741 | 47895711 | 47895722 |
| 4           | 654-3p      | 0              |          |          |
| MIMAT001819 | hsa-miR-    | ENSG0000017741 | 47897079 | 47897100 |
| 9           | 3924        | 0              |          |          |
| MIMAT000009 | hsa-miR-96- | ENSG0000017741 | 47897098 | 47897122 |
| 5           | 5p          | 0              |          |          |
| MIMAT000579 | hsa-miR-    | ENSG0000017741 | 47897098 | 47897122 |
| 6           | 1271-5p     | 0              |          |          |
| MIMAT000025 | hsa-miR-7-  | ENSG0000017741 | 47897110 | 47897132 |
| 2           | 5p          | 0              |          |          |
| MIMAT000497 | hsa-miR-934 | ENSG0000017741 | 47897123 | 47897146 |
| 7           |             | 0              |          |          |
| MIMAT000283 | hsa-miR-    | ENSG0000017741 | 47897138 | 47897158 |
| 3           | 520a-5p     | 0              |          |          |
| MIMAT000283 | hsa-miR-    | ENSG0000017741 | 47897138 | 47897158 |
| 8           | 525-5p      | 0              |          |          |
| MIMAT001970 | hsa-miR-    | ENSG0000017741 | 47897143 | 47897164 |
| 0           | 4640-3p     | 0              |          |          |
| MIMAT000333 | hsa-miR-421 | ENSG0000017741 | 47897246 | 47897272 |
| 9           |             | 0              |          |          |
| MIMAT000045 | hsa-miR-    | ENSG0000017741 | 47897271 | 47897292 |
| 9           | 193a-3p     | 0              |          |          |

---

---

|             |          |                |          |          |
|-------------|----------|----------------|----------|----------|
| MIMAT000281 | hsa-miR- | ENSG0000017741 |          |          |
| 9           | 193b-3p  | 0              | 47897273 | 47897292 |
| MIMAT000591 | hsa-miR- | ENSG0000017741 |          |          |
| 9           | 548o-3p  | 0              | 47897274 | 47897296 |
| MIMAT000579 | hsa-miR- | ENSG0000017741 |          |          |
| 5           | 1323     | 0              | 47897275 | 47897296 |
| MIMAT001980 | hsa-miR- | ENSG0000017741 |          |          |
| 1           | 4703-5p  | 0              | 47897340 | 47897365 |
| MIMAT001835 | hsa-miR- | ENSG0000017741 |          |          |
| 8           | 3942-5p  | 0              | 47897344 | 47897365 |
| MIMAT001498 | hsa-miR- | ENSG0000017741 |          |          |
| 3           | 3121-3p  | 0              | 47897373 | 47897394 |
| MIMAT000045 | hsa-miR- | ENSG0000017741 |          |          |
| 1           | 150-5p   | 0              | 47897429 | 47897448 |
| MIMAT000283 | hsa-miR- | ENSG0000017741 |          |          |
| 4           | 520a-3p  | 0              | 47897666 | 47897691 |
| MIMAT000072 | hsa-miR- | ENSG0000017741 |          |          |
| 4           | 372-3p   | 0              | 47897667 | 47897691 |
| MIMAT000068 | hsa-miR- | ENSG0000017741 |          |          |
| 4           | 302a-3p  | 0              | 47897669 | 47897691 |
| MIMAT000071 | hsa-miR- | ENSG0000017741 |          |          |
| 5           | 302b-3p  | 0              | 47897669 | 47897691 |

---

---

|             |          |                |          |          |
|-------------|----------|----------------|----------|----------|
| MIMAT000071 | hsa-miR- | ENSG0000017741 | 47897669 | 47897691 |
| 7           | 302c-3p  | 0              |          |          |
| MIMAT000071 | hsa-miR- | ENSG0000017741 | 47897669 | 47897691 |
| 8           | 302d-3p  | 0              |          |          |
| MIMAT000072 | hsa-miR- | ENSG0000017741 | 47897670 | 47897691 |
| 6           | 373-3p   | 0              |          |          |
| MIMAT000285 | hsa-miR- | ENSG0000017741 | 47897670 | 47897691 |
| 6           | 520d-3p  | 0              |          |          |
| MIMAT000282 | hsa-miR- | ENSG0000017741 | 47897671 | 47897691 |
| 5           | 520e     | 0              |          |          |
| MIMAT000284 | hsa-miR- | ENSG0000017741 | 47897671 | 47897691 |
| 6           | 520c-3p  | 0              |          |          |
| MIMAT000284 | hsa-miR- | ENSG0000017741 | 47897672 | 47897691 |
| 3           | 520b     | 0              |          |          |
| MIMAT000593 | hsa-miR- | ENSG0000017741 | 47897675 | 47897691 |
| 1           | 302e     | 0              |          |          |
| MIMAT000283 | hsa-miR- | ENSG0000017741 | 47905597 | 47905617 |
| 8           | 525-5p   | 0              |          |          |
| MIMAT000283 | hsa-miR- | ENSG0000017741 | 47905599 | 47905617 |
| 3           | 520a-5p  | 0              |          |          |
| MIMAT002757 | hsa-miR- | ENSG0000017741 | 47905619 | 47905642 |
| 1           | 6835-3p  | 0              |          |          |

---



---

|             |          |                |          |          |
|-------------|----------|----------------|----------|----------|
| MIMAT000479 | hsa-miR- | ENSG0000017741 |          |          |
| 7           | 582-3p   | 0              | 47905651 | 47905672 |
| MIMAT001819 | hsa-miR- | ENSG0000017741 |          |          |
| 9           | 3924     | 0              | 47905672 | 47905694 |
| MIMAT000288 | hsa-miR- | ENSG0000017741 |          |          |
| 2           | 510-5p   | 0              | 47905679 | 47905702 |
| MIMAT001025 | hsa-miR- | ENSG0000017741 |          |          |
| 1           | 449c-5p  | 0              | 47905736 | 47905762 |
| MIMAT000068 | hsa-miR- | ENSG0000017741 |          |          |
| 5           | 34b-5p   | 0              | 47905738 | 47905762 |
| MIMAT001351 | hsa-miR- | ENSG0000017741 |          |          |
| 7           | 2682-5p  | 0              | 47905738 | 47905762 |
| MIMAT001505 | hsa-miR- | ENSG0000017741 |          |          |
| 0           | 323b-3p  | 0              | 47907425 | 47907441 |
| MIMAT000282 | hsa-miR- | ENSG0000017741 |          |          |
| 3           | 512-3p   | 0              | 47912146 | 47912171 |
| MIMAT000068 | hsa-miR- | ENSG0000017741 |          |          |
| 4           | 302a-3p  | 0              | 47912146 | 47912172 |
| MIMAT000071 | hsa-miR- | ENSG0000017741 |          |          |
| 5           | 302b-3p  | 0              | 47912146 | 47912172 |
| MIMAT000071 | hsa-miR- | ENSG0000017741 |          |          |
| 7           | 302c-3p  | 0              | 47912146 | 47912172 |

---

---

|             |          |                |          |          |
|-------------|----------|----------------|----------|----------|
| MIMAT000071 | hsa-miR- | ENSG0000017741 |          |          |
| 8           | 302d-3p  | 0              | 47912146 | 47912172 |
| MIMAT000072 | hsa-miR- | ENSG0000017741 |          |          |
| 4           | 372-3p   | 0              | 47912146 | 47912172 |
| MIMAT002546 | hsa-miR- | ENSG0000017741 |          |          |
| 4           | 6504-5p  | 0              | 47912147 | 47912167 |
| MIMAT001986 | hsa-miR- | ENSG0000017741 |          |          |
| 4           | 3064-5p  | 0              | 47912148 | 47912167 |
| MIMAT000283 | hsa-miR- | ENSG0000017741 |          |          |
| 4           | 520a-3p  | 0              | 47912151 | 47912172 |
| MIMAT000072 | hsa-miR- | ENSG0000017741 |          |          |
| 6           | 373-3p   | 0              | 47912152 | 47912172 |
| MIMAT000282 | hsa-miR- | ENSG0000017741 |          |          |
| 5           | 520e     | 0              | 47912152 | 47912172 |
| MIMAT000284 | hsa-miR- | ENSG0000017741 |          |          |
| 6           | 520c-3p  | 0              | 47912152 | 47912172 |
| MIMAT000285 | hsa-miR- | ENSG0000017741 |          |          |
| 6           | 520d-3p  | 0              | 47912152 | 47912172 |
| MIMAT000284 | hsa-miR- | ENSG0000017741 |          |          |
| 3           | 520b     | 0              | 47912153 | 47912172 |
| MIMAT000593 | hsa-miR- | ENSG0000017741 |          |          |
| 1           | 302e     | 0              | 47912157 | 47912172 |

---

|             |          |                |          |          |
|-------------|----------|----------------|----------|----------|
| MIMAT002547 | hsa-miR- | ENSG0000017741 | 47912170 | 47912191 |
| 5           | 6509-3p  | 0              |          |          |
| MIMAT000479 | hsa-miR- | ENSG0000017741 | 47912189 | 47912212 |
| 9           | 589-5p   | 0              |          |          |

**Supplementary Table 4** A total of 54 potential target genes of miR-7-5p were predicted using predictive datasets miRDB, DIANA, miRmap, and PicTar.

|         |          |         |          |         |
|---------|----------|---------|----------|---------|
| ABCG4   | CCNT2    | HELLS   | PDE4D    | SCAMP5  |
| ACSL4   | CGGBP1   | HPCAL4  | PFN2     | SEMA4C  |
| ANKFY1  | CKAP4    | IRS2    | PLCB1    | SERP1   |
| ANKRD12 | CNN3     | KLF12   | POGK     | SLC4A7  |
| ARF4    | CNOT8    | KLF4    | POLE4    | SMARCD1 |
| ARID4A  | CSMD3    | KPNA1   | PPARGC1A | SNCA    |
| ATP2B2  | DACH1    | LEMD3   | PSME3    | SPATA2  |
| ATRX    | EIF4EBP2 | NR4A3   | RAF1     | TFRC    |
| BMPR2   | ESRRG    | NXT2    | RB1      | VDAC1   |
| CALU    | FLRT2    | OGT     | RNF141   | ZNF395  |
| CAPZA1  | GLI3     | OSBPL11 | RSBN1    |         |
